# Supplementary material
Source: HighWire-hosted journal article supplement (https://qdcxjkg.com/highwire/filestream/114148/field_highwire_adjunct_files/1/Supplementary_Tabel_S2.pdf)
Supplement: Supplementary_Tabel_S2.pdf [file Supplementary_Tabel_S2.pdf]

Supplementary Table S2. Assessment of risk of bias in included trials

| Study                    | Selection bias (sequence generation & allocation concealment)                                            | Performance bias & detection bias (Blinding)                        | Attrition bias (Incomplete outcome data)                                                                                    | Reporting bias (Selective outcome reporting) |
|--------------------------|----------------------------------------------------------------------------------------------------------|---------------------------------------------------------------------|-----------------------------------------------------------------------------------------------------------------------------|----------------------------------------------|
| Barker 2000 & Couch 2001 | Unclear (blocked randomisation, but no information provided for allocation concealment)                  | Low (double-blind)                                                  | High (13 withdrawals, 6 (16.2%) in the tobramycin and 7 (18.9%) in the placebo group)                                       | Low                                          |
| Drobnic 2005             | Unclear                                                                                                  | Low (double-blind)                                                  | High (5 deaths and 4 withdrawals, 7 (23.3%) in the tobramycin and 2 (6.7%) in the placebo group)                            | Low                                          |
| Haworth 2014             | Unclear                                                                                                  | Low (double-blind)                                                  | High (3 deaths and 22 withdrawals, 12 (16.4%) in the colistin and 13 (18.3%) in the placebo group)                          | Low                                          |
| Murray 2011              | Unclear (randomisation was by the study pharmacist, but no information provided for sequence generation) | Low (single-blind, study pharmacist and investigators were blinded) | High (2 deaths and 6 withdrawals, 5 (15.6%) in the gentamicin and 3 (9.1%) in the placebo group)                            | Low                                          |
| Orrriols 1999            | Unclear                                                                                                  | High(open-label)                                                    | High (1 death and 1 withdrawal, 1 (12.5%) in the tobramycin + ceftazidime and 1 (11.1%) in the symptomatic treatment group) | Low                                          |
| TRO2-107 2009            | Unclear                                                                                                  | Low (double-blind)                                                  | Low (2 withdrawals, 1 (2.3%) in the amikacin and 1(5%) in the placebo group)                                                | Low                                          |
| Serisier 2013            | Low (central randomization)                                                                              | Low (double-blind)                                                  | High (5 withdrawals, 2 (10%) in the ciprofloxacin and 3 (13.6%) in the placebo group)                                       | Low                                          |
| Wilson 2013              | Unclear                                                                                                  | Low (double-blind)                                                  | High (50 withdrawals – 40.3%)                                                                                               | Low                                          |
